# Supplementary material for: Conjunctival MicroRNA Expression in Inflammatory Trachomatous Scarring
Source: PLoS Negl Trop Dis. 2013 Mar 14;7(3):e2117. doi: 10.1371/journal.pntd.0002117 (PMC3597489; doi:10.1371/journal.pntd.0002117)
Supplement: Table S1 — MIQE guidelines for array and qPCR processing. (XLS) [file pntd.0002117.s004.xls]

## Sheet: Sheet1
ITEM TO CHECK	IMPORTANCE	CHECKLIST	SECTION	NOTES
EXPERIMENTAL DESIGN
Definition of experimental and control groups	E	y	Ethical permission, study participants and clinical assessment
Number within each group	E	y	Table 1&4
Assay carried out by core lab or investigator's lab?	D	y	Contributions
Acknowledgement of authors' contributions	D	y	Contributions
SAMPLE
Description	E	y	Sample collection and processing
Volume/mass of sample processed	D	y	Taqman microfluidic array miR genecards/ Extraction of miR for Quantitative real-time miR qPCR
Microdissection or macrodissection	E	na		Swab samples
Processing procedure	E	y	Sample collection and processing
If frozen - how and how quickly?	E	y	Sample collection and processing
If fixed - with what, how quickly?	E	y	Sample collection and processing
Sample storage conditions and duration (especially for FFPE samples)	E	y	Sample collection and processing
NUCLEIC ACID EXTRACTION
Procedure and/or instrumentation	E	y	Taqman microfluidic array miR genecards/ Extraction of miR for Quantitative real-time miR qPCR
Name of kit and details of any modifications	E	y	Taqman microfluidic array miR genecards/ Extraction of miR for Quantitative real-time miR qPCR
Source of additional reagents used	D	y	Taqman microfluidic array miR genecards/ Extraction of miR for Quantitative real-time miR qPCR
Details of DNase or RNAse treatment	E	y	Taqman microfluidic array miR genecards/ Extraction of miR for Quantitative real-time miR qPCR
Contamination assessment (DNA or RNA)	E	n
Nucleic acid quantification	E	y	Taqman microfluidic array miR genecards/ Extraction of miR for Quantitative real-time miR qPCR
Instrument and method	E	y	Taqman microfluidic array miR genecards/ Extraction of miR for Quantitative real-time miR qPCR
Purity (A260/A280)	D	n
Yield	D	n
RNA integrity method/instrument	E	n
RIN/RQI or Cq of 3' and 5' transcripts	E	n
Electrophoresis traces	D	n
Inhibition testing (Cq dilutions, spike or other)	E	n
REVERSE TRANSCRIPTION
Complete reaction conditions	E	y	Taqman microfluidic array miR genecards/ Extraction of miR for Quantitative real-time miR qPCR
Amount of RNA and reaction volume	E	y	Taqman microfluidic array miR genecards/ Extraction of miR for Quantitative real-time miR qPCR
Priming oligonucleotide (if using GSP) and concentration	E	y	Taqman microfluidic array miR genecards/ Extraction of miR for Quantitative real-time miR qPCR
Reverse transcriptase and concentration	E	y	Taqman microfluidic array miR genecards/ Extraction of miR for Quantitative real-time miR qPCR
Temperature and time	E	y	Taqman microfluidic array miR genecards/ Extraction of miR for Quantitative real-time miR qPCR
Manufacturer of reagents and catalogue numbers	D	y	Taqman microfluidic array miR genecards/ Extraction of miR for Quantitative real-time miR qPCR
Cqs with and without RT	D*	n
Storage conditions of cDNA	D	y	Taqman microfluidic array miR genecards/ Extraction of miR for Quantitative real-time miR qPCR
qPCR TARGET INFORMATION
If multiplex, efficiency and LOD of each assay.	E	na		Qiagen IP
Sequence accession number	E	y	Supplementary table 7.
Location of amplicon	D	na		Qiagen IP
Amplicon length	E	na		Qiagen IP
In silico specificity screen (BLAST, etc)	E	na		Qiagen IP
Pseudogenes, retropseudogenes or other homologs?	D	na		Qiagen IP
Sequence alignment	D	na		Qiagen IP
Secondary structure analysis of amplicon	D	na		Qiagen IP
Location of each primer by exon or intron (if applicable)	E	na		Qiagen IP
What splice variants are targeted?	E	na		Qiagen IP
qPCR OLIGONUCLEOTIDES
Primer sequences	E	na	Supplementary table 7.	Qiagen IP
RTPrimerDB Identification Number	D	na	Supplementary table 7.
Probe sequences	D**	na		FAM (ABI IP) and SYBR green
Location and identity of any modifications	E	na
Manufacturer of oligonucleotides	D	y	Taqman microfluidic array miR genecards/ Extraction of miR for Quantitative real-time miR qPCR
Purification method	D	na		Qiagen IP
qPCR PROTOCOL
Complete reaction conditions	E	y	Taqman microfluidic array miR genecards/ Extraction of miR for Quantitative real-time miR qPCR
Reaction volume and amount of cDNA/DNA	E	y	Taqman microfluidic array miR genecards/ Extraction of miR for Quantitative real-time miR qPCR
Primer, (probe), Mg++ and dNTP concentrations	E	y	Taqman microfluidic array miR genecards/ Extraction of miR for Quantitative real-time miR qPCR
Polymerase identity and concentration	E	y	Taqman microfluidic array miR genecards/ Extraction of miR for Quantitative real-time miR qPCR
Buffer/kit identity and manufacturer	E	y	Taqman microfluidic array miR genecards/ Extraction of miR for Quantitative real-time miR qPCR
Exact chemical constitution of the buffer	D	y	Taqman microfluidic array miR genecards/ Extraction of miR for Quantitative real-time miR qPCR
Additives (SYBR Green I, DMSO, etc.)	E	y	Taqman microfluidic array miR genecards/ Extraction of miR for Quantitative real-time miR qPCR
Manufacturer of plates/tubes and catalog number	D	n
Complete thermocycling parameters	E	y	Taqman microfluidic array miR genecards/ Extraction of miR for Quantitative real-time miR qPCR
Reaction setup (manual/robotic)	D	y	Taqman microfluidic array miR genecards/ Extraction of miR for Quantitative real-time miR qPCR
Manufacturer of qPCR instrument	E	y	Taqman microfluidic array miR genecards/ Extraction of miR for Quantitative real-time miR qPCR
qPCR VALIDATION
Evidence of optimisation (from gradients)	D	n			Qiagen
Specificity (gel, sequence, melt, or digest)	E	n			www.qiagen.com/miScriptAssays
For SYBR Green I, Cq of the NTC	E	n			Quality Control: In accordance with QIAGEN’s ISO-certified Quality Management System, each lot of miScript II RT Kit, miScript SYBR Green PCR Kit, miScript PCR Starter Kit, miScript Primer Assay, and miScript Precursor Assay is tested against predetermined specifications to ensure consistent product quality.
Standard curves with slope and y-intercept	E	n
PCR efficiency calculated from slope	E	n
Confidence interval for PCR efficiency or standard error	D	n			ABI
r2 of standard curve	E	n			http://www.frontiers-in-genetics.org/documents/gen-technology/abi_taqman.pdf
Linear dynamic range	E	n			To ensure accurate results, every individ- ual TaqMan MicroRNA Assay design has been functionally validated under laboratory conditions.
Cq variation at lower limit	E	n
Confidence intervals throughout range	D	n
Evidence for limit of detection	E	n
If multiplex, efficiency and LOD of each assay.	E	n
DATA ANALYSIS
qPCR analysis program (source, version)	E	y	Array analysis/ qPCR analysis
Cq method determination	E	y	Array analysis/ qPCR analysis
Outlier identification and disposition	E	y	Array analysis/ qPCR analysis
Results of NTCs	E	n
Justification of number and choice of reference genes	E	y	Array analysis/ qPCR results
Description of normalisation method	E	y	Array analysis/ qPCR analysis
Number and concordance of biological replicates	D	y	Array analysis/ qPCR analysis
Number and stage (RT or qPCR) of technical replicates	E	y	qPCR analysis
Repeatability (intra-assay variation)	E	y	Extraction of miR for Quantitative real-time miR qPCR
Reproducibility (inter-assay variation, %CV)	D	y	Taqman microfluidic array miR genecards/ Extraction of miR for Quantitative real-time miR qPCR	Endogenous controls on each plate
Power analysis	D	n
Statistical methods for result significance	E	y	Array analysis/ qPCR analysis
Software (source, version)	E	y	Array analysis/ qPCR analysis
Cq or raw data submission using RDML	D	y	Array analysis
Table 1. MIQE checklist for authors, reviewers and editors. All essential information (E) must be submitted with the manuscript. Desirable
information (D) should be submitted if available. If using primers obtained from RTPrimerDB, information on qPCR target, oligonucleotides,
protocols and validation is available from that source.
*: Assessing the absence of DNA using a no RT assay is essential when first extracting RNA. Once the sample has been validated as
RDNA-free, inclusion of a no-RT control is desirable, but no longer essential.
**: Disclosure of the probe sequence is highly desirable and strongly encouraged. However, since not all commercial pre-designed assay
vendors provide this information, it cannot be an essential requirement. Use of such assays is advised against.
